# Supplementary material for: Colistin and tobramycin resistance during long- term use of selective decontamination strategies in the intensive care unit: a post hoc analysis
Source: PubMed Central journal article supplement (PMC4373110; doi:10.1186/s13054-015-0838-4), 2015-03-25
Supplement: 13054_2015_838_MOESM1_ESM.pdf [file 13054_2015_838_MOESM1_ESM.pdf]

Table 2: Characteristics of the two studies

|                                                                 | Study period I (3)                                                                                                 | Study period II (6)                                                                                                    |
|-----------------------------------------------------------------|--------------------------------------------------------------------------------------------------------------------|------------------------------------------------------------------------------------------------------------------------|
| Years in which inclusion took place                             | 2004-2006                                                                                                          | 2009-2013                                                                                                              |
| Participating hospitals (n)                                     | 13                                                                                                                 | 16                                                                                                                     |
| Patients included (n)                                           | 5939                                                                                                               | 11997                                                                                                                  |
| Duration of intervention                                        |                                                                                                                    |                                                                                                                        |
| SDD                                                             | 6 months                                                                                                           | 12 months                                                                                                              |
| SOD                                                             | 6 months                                                                                                           | 12 months                                                                                                              |
| Standard care                                                   | 6 months                                                                                                           | NA                                                                                                                     |
| Inclusion criteria to receive SDD/SOD                           | Mechanical ventilation > 48 hours<br>and/or<br>Length of stay > 72 hours                                           | Mechanical ventilation > 48 hours                                                                                      |
| Antibiotics used in SDD/SOD                                     |                                                                                                                    |                                                                                                                        |
| Tobramycin                                                      | Mouthpaste: 2% concentration<br>Suspension: 80mg <sup>a</sup>                                                      | <i>idem</i>                                                                                                            |
| Colistin                                                        | Mouthpaste: 2% concentration<br>Suspension: 100mg <sup>a</sup>                                                     | <i>idem</i>                                                                                                            |
| Amphotericin                                                    | Mouthpaste: 2% concentration<br>Suspension: 500mg <sup>a</sup>                                                     | <i>idem</i>                                                                                                            |
| Systemic prophylaxis                                            | Cefotaxim 4000mg daily <sup>a</sup>                                                                                | <i>idem</i>                                                                                                            |
| <b>Methods</b>                                                  |                                                                                                                    |                                                                                                                        |
| Point prevalence surveys available (n)                          | 18                                                                                                                 | 24                                                                                                                     |
| Culture media used for screening in<br>point prevalence surveys | McConkey with<br>- polymyxin B 50iu/ml (5mg/l)<br>- tobramycin 8mg/l<br>- cefotaxim 8mg/l<br>- ciprofloxacin 2mg/l | McConkey with<br>- polymyxin E (colistin) 4mg/l<br>- tobramycin 8mg/l<br>ESBL chromogenic agar<br>VRE chromogenic agar |

<sup>a</sup> only during SDD

Abbreviations: SDD: selective digestive tract decontamination; SOD: selective oropharyngeal decontamination; NA: not applicable; ESBL: extended spectrum beta-lactamase; VRE vancomycin resistant enterococcus
